# Supplementary material
Source: MDPI journal article supplement (https://www.mdpi.com/2073-4352/7/1/10)

# checkCIF/PLATON report

You have not supplied any structure factors. As a result the full set of tests cannot be run.

THIS REPORT IS FOR GUIDANCE ONLY. IF USED AS PART OF A REVIEW PROCEDURE FOR PUBLICATION, IT SHOULD NOT REPLACE THE EXPERTISE OF AN EXPERIENCED CRYSTALLOGRAPHIC REFEREE.

No syntax errors found.      CIF dictionary      Interpreting this report

## Datablock: 2

---

Bond precision:    O- C = 0.0170 A                      Wavelength=0.71073

Cell:                      a=10.075(3)              b=10.075(3)              c=12.639(5)  
                                alpha=90              beta=90              gamma=120  
Temperature:              293 K

|                | Calculated                             | Reported          |
|----------------|----------------------------------------|-------------------|
| Volume         | 1111.1(9)                              | 1111.2(7)         |
| Space group    | P 63 m c                               | P63mc             |
| Hall group     | P 6c -2c                               | P 6c -2c          |
| Moiety formula | C3 O9, 4(C O3), C O3, Rb, 5(Ca), 5(Na) | ?                 |
| Sum formula    | C8 Ca5 Na5 O24 Rb                      | C8 Ca5 Na5 O24 Rb |
| Mr             | 880.90                                 | 880.90            |
| Dx,g cm-3      | 2.633                                  | 2.633             |
| Z              | 2                                      | 2                 |
| Mu (mm-1)      | 3.600                                  | 3.600             |
| F000           | 864.0                                  | 864.0             |
| F000'          | 865.20                                 |                   |
| h,k,lmax       | 13,13,16                               | 13,13,16          |
| Nref           | 991[ 519]                              | 982               |
| Tmin,Tmax      | 0.806,0.835                            | 0.911,1.000       |
| Tmin'          | 0.698                                  |                   |

Correction method= # Reported T Limits: Tmin=0.911 Tmax=1.000  
AbsCorr = MULTI-SCAN

Data completeness= 1.89/0.99                      Theta(max)= 27.460

R(reflections)= 0.0450( 967)                      wR2(reflections)= 0.1129( 982)

S = 1.240                      Npar= 88

---

The following ALERTS were generated. Each ALERT has the format

**test-name\_ALERT\_alert-type\_alert-level.**

Click on the hyperlinks for more details of the test.

---

### ● Alert level B

PLAT090\_ALERT\_3\_B Poor Data / Parameter Ratio (Zmax > 18) ..... 5.90 Note  
PLAT242\_ALERT\_2\_B Low 'MainMol' Ueq as Compared to Neighbors of C4 Check  
PLAT732\_ALERT\_1\_B Angle Calc 60.09(13), Rep 60.08(3) ..... 4.33 s.u.-R  
O2 -C2 -CA1 1.555 1.555 1.555 .... # 358 Check

---

### ● Alert level C

ABSTY02\_ALERT\_1\_C An \_exptl\_absorpt\_correction\_type has been given without  
a literature citation. This should be contained in the  
\_exptl\_absorpt\_process\_details field.  
Absorption correction given as Multi-scan  
PLAT036\_ALERT\_1\_C No s.u. Given for Flack Parameter ..... Please Do !  
PLAT220\_ALERT\_2\_C Non-Solvent Resd 2 0 Ueq(max)/Ueq(min) Range 4.1 Ratio  
PLAT242\_ALERT\_2\_C Low 'MainMol' Ueq as Compared to Neighbors of C3 Check

---

### ● Alert level G

FORMU01\_ALERT\_2\_G There is a discrepancy between the atom counts in the  
\_chemical\_formula\_sum and the formula from the \_atom\_site\* data.  
Atom count from \_chemical\_formula\_sum: C8 Ca5 Na5 O24 Rb1  
Atom count from the \_atom\_site data: C8 Ca4.99 Na5.01 O24.01 Rb1  
CELLZ01\_ALERT\_1\_G Difference between formula and atom\_site contents detected.  
CELLZ01\_ALERT\_1\_G ALERT: check formula stoichiometry or atom site occupancies.  
From the CIF: \_cell\_formula\_units\_Z 2  
From the CIF: \_chemical\_formula\_sum C8 Ca5 Na5 O24 Rb  
TEST: Compare cell contents of formula and atom\_site data

| atom | Z*formula | cif sites | diff  |
|------|-----------|-----------|-------|
| C    | 16.00     | 16.00     | 0.00  |
| Ca   | 10.00     | 9.98      | 0.02  |
| Na   | 10.00     | 10.02     | -0.02 |
| O    | 48.00     | 48.02     | -0.02 |
| Rb   | 2.00      | 2.00      | 0.00  |

PLAT003\_ALERT\_2\_G Number of Uiso or Uij Restrained non-H Atoms ... 2 Report  
PLAT004\_ALERT\_5\_G Polymeric Structure Found with Maximum Dimension 1 Info  
PLAT005\_ALERT\_5\_G No Embedded Refinement Details found in the CIF Please Do !  
PLAT040\_ALERT\_1\_G No H-atoms in this Carbon Containing Compound .. Please Check  
PLAT152\_ALERT\_1\_G The Supplied and Calc. Volume s.u. Differ by ... 2 Units  
PLAT199\_ALERT\_1\_G Reported \_cell\_measurement\_temperature ..... (K) 293 Check  
PLAT200\_ALERT\_1\_G Reported \_diffrn\_ambient\_temperature ..... (K) 293 Check  
PLAT300\_ALERT\_4\_G Atom Site Occupancy of >O7 is Constrained at 0.6667 Check  
PLAT300\_ALERT\_4\_G Atom Site Occupancy of <Ca2 is Constrained at 0.3333 Check  
PLAT300\_ALERT\_4\_G Atom Site Occupancy of >Na2 is Constrained at 0.6667 Check  
PLAT301\_ALERT\_3\_G Main Residue Disorder ..... Percentage = 10 Note  
PLAT860\_ALERT\_3\_G Number of Least-Squares Restraints ..... 13 Note  
PLAT899\_ALERT\_4\_G SHELXL97 is Deprecated and Succeeded by SHELXL 2014 Note

- 
- 0 **ALERT level A** = Most likely a serious problem - resolve or explain  
3 **ALERT level B** = A potentially serious problem, consider carefully  
4 **ALERT level C** = Check. Ensure it is not caused by an omission or oversight  
16 **ALERT level G** = General information/check it is not something unexpected

9 ALERT type 1 CIF construction/syntax error, inconsistent or missing data

5 ALERT type 2 Indicator that the structure model may be wrong or deficient  
3 ALERT type 3 Indicator that the structure quality may be low  
4 ALERT type 4 Improvement, methodology, query or suggestion  
2 ALERT type 5 Informative message, check

---

It is advisable to attempt to resolve as many as possible of the alerts in all categories. Often the minor alerts point to easily fixed oversights, errors and omissions in your CIF or refinement strategy, so attention to these fine details can be worthwhile. In order to resolve some of the more serious problems it may be necessary to carry out additional measurements or structure refinements. However, the purpose of your study may justify the reported deviations and the more serious of these should normally be commented upon in the discussion or experimental section of a paper or in the "special\_details" fields of the CIF. checkCIF was carefully designed to identify outliers and unusual parameters, but every test has its limitations and alerts that are not important in a particular case may appear. Conversely, the absence of alerts does not guarantee there are no aspects of the results needing attention. It is up to the individual to critically assess their own results and, if necessary, seek expert advice.

### **Publication of your CIF in IUCr journals**

A basic structural check has been run on your CIF. These basic checks will be run on all CIFs submitted for publication in IUCr journals (*Acta Crystallographica*, *Journal of Applied Crystallography*, *Journal of Synchrotron Radiation*); however, if you intend to submit to *Acta Crystallographica Section C* or *E* or *IUCrData*, you should make sure that full publication checks are run on the final version of your CIF prior to submission.

### **Publication of your CIF in other journals**

Please refer to the *Notes for Authors* of the relevant journal for any special instructions relating to CIF submission.

---

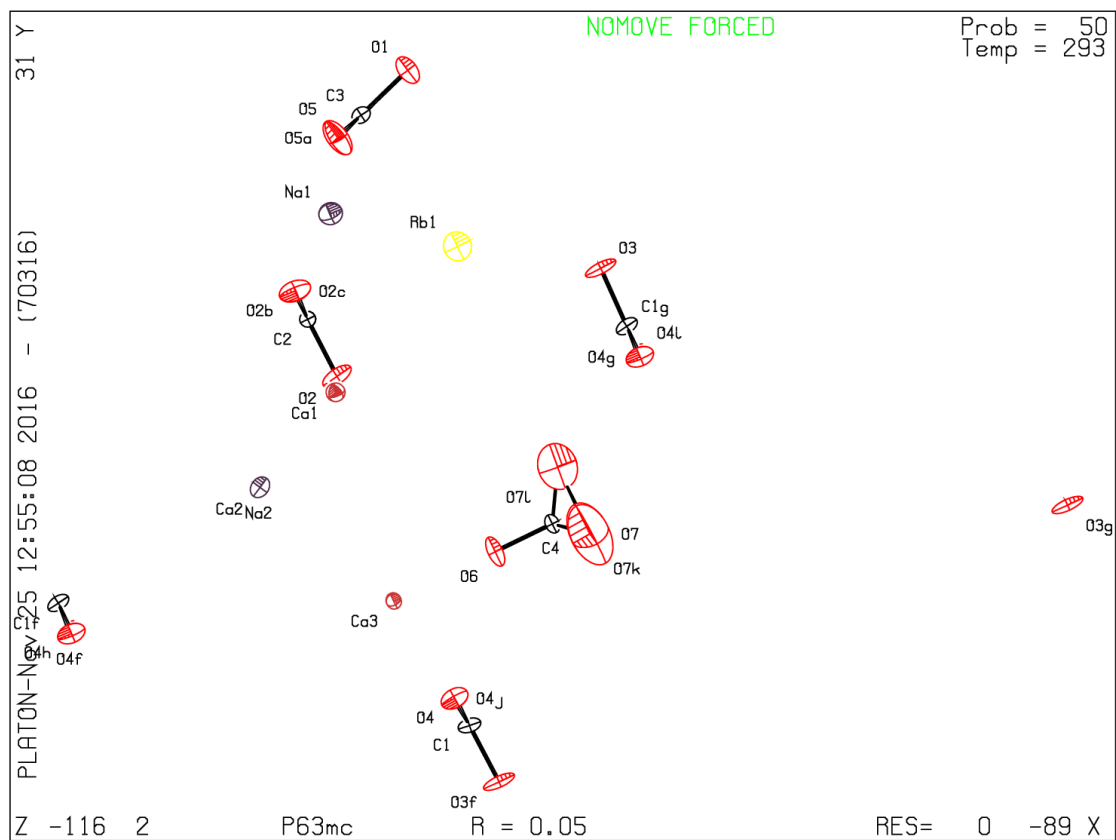

Supplement: s1 [file s1 › checkcif.pdf]
