# Supplementary material
Source: MDPI journal article supplement (https://www.mdpi.com/2073-4352/7/1/10)
Supplement: s1 [file s1]

Archive with 3 entries (3 files):
- crystals-167093-supplementary.docx
- 2.cif
- checkcif.pdf
