# Supplementary material
Source: MDPI journal article supplement (https://www.mdpi.com/2073-4352/7/1/10)
Supplement: s1 [file s1 › 2.cif]

 
data_2 
 
_audit_creation_method            SHELXL-97 
_chemical_name_systematic 
; 
 ? 
; 
_chemical_name_common             ? 
_chemical_melting_point           ? 
_chemical_formula_moiety          ? 
_chemical_formula_sum 
 'C8 Ca5 Na5 O24 Rb' 
_chemical_formula_weight          880.90 
 
loop_ 
 _atom_type_symbol 
 _atom_type_description 
 _atom_type_scat_dispersion_real 
 _atom_type_scat_dispersion_imag 
 _atom_type_scat_source 
 'C'  'C'   0.0033   0.0016 
 'International Tables Vol C Tables 4.2.6.8 and 6.1.1.4' 
 'O'  'O'   0.0106   0.0060 
 'International Tables Vol C Tables 4.2.6.8 and 6.1.1.4' 
 'Na'  'Na'   0.0362   0.0249 
 'International Tables Vol C Tables 4.2.6.8 and 6.1.1.4' 
 'Ca'  'Ca'   0.2262   0.3064 
 'International Tables Vol C Tables 4.2.6.8 and 6.1.1.4' 
 'Rb'  'Rb'  -0.9393   2.9676 
 'International Tables Vol C Tables 4.2.6.8 and 6.1.1.4' 
 
_symmetry_cell_setting            hexagonal 
_symmetry_space_group_name_H-M   P63mc 
_space_group_name_Hall            'P 6c -2c ' 
 
loop_ 
 _symmetry_equiv_pos_as_xyz 
 'x, y, z' 
 '-y, x-y, z' 
 '-x+y, -x, z' 
 '-x, -y, z+1/2' 
 'y, -x+y, z+1/2' 
 'x-y, x, z+1/2' 
 '-y, -x, z' 
 '-x+y, y, z' 
 'x, x-y, z' 
 'y, x, z+1/2' 
 'x-y, -y, z+1/2' 
 '-x, -x+y, z+1/2' 
 
_cell_length_a                    10.075(3) 
_cell_length_b                    10.075(3) 
_cell_length_c                    12.639(5) 
_cell_angle_alpha                 90.00 
_cell_angle_beta                  90.00 
_cell_angle_gamma                 120.00 
_cell_volume                      1111.2(7) 
_cell_formula_units_Z             2 
_cell_measurement_temperature     293(2) 
_cell_measurement_reflns_used           3248
_cell_measurement_theta_min             2.3341
_cell_measurement_theta_max             27.4546
 
_exptl_crystal_description              'Prism'
_exptl_crystal_colour                   'White'
_exptl_crystal_size_max                 0.1000
_exptl_crystal_size_mid                 0.0500
_exptl_crystal_size_min                 0.0500
_exptl_crystal_density_meas       ? 
_exptl_crystal_density_diffrn     2.633 
_exptl_crystal_density_method     'not measured' 
_exptl_crystal_F_000              864 
_exptl_absorpt_coefficient_mu     3.600 
_exptl_absorpt_correction_type          'Multi-scan'
_exptl_absorpt_correction_T_max         1.0000
_exptl_absorpt_correction_T_min         0.9113
_exptl_absorpt_process_details    ? 
 
_exptl_special_details 
; 
 ? 
; 
 
_diffrn_ambient_temperature       293(2) 
_diffrn_radiation_wavelength      0.71073 
_diffrn_radiation_type            MoK\a 
_diffrn_radiation_source          'fine-focus sealed tube' 
_diffrn_radiation_monochromator   graphite 
_diffrn_measurement_device
;
Mercury70 (2x2 bin mode)
; 
_diffrn_measurement_method              'CCD_Profile_fitting'
_diffrn_detector_area_resol_mean        14.6306
_diffrn_standards_number          ? 
_diffrn_standards_interval_count  none 
_diffrn_standards_interval_time   none 
_diffrn_standards_decay_%         ? 
_diffrn_reflns_number             8237 
_diffrn_reflns_av_R_equivalents   0.0442 
_diffrn_reflns_av_sigmaI/netI     0.0219 
_diffrn_reflns_limit_h_min        -13 
_diffrn_reflns_limit_h_max        12 
_diffrn_reflns_limit_k_min        -12 
_diffrn_reflns_limit_k_max        13 
_diffrn_reflns_limit_l_min        -16 
_diffrn_reflns_limit_l_max        16 
_diffrn_reflns_theta_min          2.33 
_diffrn_reflns_theta_max          27.46 
_reflns_number_total              982 
_reflns_number_gt                 967 
_reflns_threshold_expression      >2sigma(I) 
 
_computing_data_collection              'CrystalClear (Rigaku Inc., 2008)'
_computing_cell_refinement              'CrystalClear (Rigaku Inc., 2008)'
_computing_data_reduction               'CrystalClear (Rigaku Inc., 2008)'
_computing_structure_solution     'SHELXS-97 (Sheldrick, 1990)' 
_computing_structure_refinement   'SHELXL-97 (Sheldrick, 1997)' 
_computing_molecular_graphics     'SHELXL-97 (Sheldrick, 1997)' 
_computing_publication_material   'SHELXL-97 (Sheldrick, 1997)' 
 
_refine_special_details 
; 
 Refinement of F^2^ against ALL reflections.  The weighted R-factor wR and 
 goodness of fit S are based on F^2^, conventional R-factors R are based 
 on F, with F set to zero for negative F^2^. The threshold expression of 
 F^2^ > 2sigma(F^2^) is used only for calculating R-factors(gt) etc. and is 
 not relevant to the choice of reflections for refinement.  R-factors based 
 on F^2^ are statistically about twice as large as those based on F, and R- 
 factors based on ALL data will be even larger. 
; 
 
_refine_ls_structure_factor_coef  Fsqd  
_refine_ls_matrix_type            full 
_refine_ls_weighting_scheme       calc  
_refine_ls_weighting_details 
 'calc w=1/[\s^2^(Fo^2^)+(0.0497P)^2^+3.5442P] where P=(Fo^2^+2Fc^2^)/3' 
_atom_sites_solution_primary      direct 
_atom_sites_solution_secondary    difmap 
_atom_sites_solution_hydrogens    . 
_refine_ls_hydrogen_treatment     .
_refine_ls_extinction_method      none 
_refine_ls_extinction_coef        ? 
_refine_ls_abs_structure_details 
 'Flack H D (1983), Acta Cryst. A39, 876-881' 
_refine_ls_abs_structure_Flack    0.00 
_refine_ls_number_reflns          982 
_refine_ls_number_parameters      88 
_refine_ls_number_restraints      13 
_refine_ls_R_factor_all           0.0454 
_refine_ls_R_factor_gt            0.0450 
_refine_ls_wR_factor_ref          0.1129 
_refine_ls_wR_factor_gt           0.1126 
_refine_ls_goodness_of_fit_ref    1.240 
_refine_ls_restrained_S_all       1.292 
_refine_ls_shift/su_max           0.000 
_refine_ls_shift/su_mean          0.000 
 
loop_ 
 _atom_site_label 
 _atom_site_type_symbol 
 _atom_site_fract_x 
 _atom_site_fract_y 
 _atom_site_fract_z 
 _atom_site_U_iso_or_equiv 
 _atom_site_adp_type 
 _atom_site_occupancy 
 _atom_site_symmetry_multiplicity 
 _atom_site_calc_flag 
 _atom_site_refinement_flags 
 _atom_site_disorder_assembly 
 _atom_site_disorder_group 
Rb1 Rb 0.3333 0.6667 0.38919(14) 0.0350(4) Uani 1 6 d S . . 
Ca1 Ca 0.50547(9) 1.01093(18) 0.11669(15) 0.0150(3) Uani 1 2 d S . . 
Ca3 Ca 0.0000 1.0000 0.0531(2) 0.0111(5) Uani 1 6 d S . . 
Na1 Na 0.14588(18) 0.2918(4) 0.2295(3) 0.0205(7) Uani 1 2 d S . . 
Na2 Na 0.18414(13) 0.81586(13) -0.05833(18) 0.0166(5) Uani 0.67 2 d SP . . 
Ca2 Ca 0.18414(13) 0.81586(13) -0.05833(18) 0.0166(5) Uani 0.33 2 d SP . . 
C1 C -0.1661(5) 1.1661(5) 0.0747(7) 0.0154(14) Uani 1 2 d S . . 
C2 C 0.3333 0.6667 0.1257(11) 0.011(2) Uani 1 6 d S . . 
C3 C 0.5167(4) 0.4833(4) 0.3430(6) 0.0148(16) Uani 1 2 d S . . 
C4 C 0.0000 1.0000 0.3320(10) 0.012(3) Uani 1 6 d S . . 
O1 O 0.5397(4) 0.4603(4) 0.4405(5) 0.0238(13) Uani 1 2 d S . . 
O2 O 0.2599(3) 0.7401(3) 0.1279(6) 0.0246(14) Uani 1 2 d S . . 
O3 O 0.2390(3) 0.7610(3) 0.5777(6) 0.0228(13) Uani 1 2 d S . . 
O4 O -0.2395(5) 1.0194(4) 0.0729(4) 0.0195(8) Uani 1 1 d . . . 
O5 O 0.3970(5) 0.3837(6) 0.2947(4) 0.0379(12) Uani 1 1 d . . . 
O6 O 0.0000 1.0000 0.2316(9) 0.031(3) Uani 1 6 d SU . . 
O7 O 0.0566(11) 1.113(2) 0.3791(19) 0.126(7) Uani 0.67 2 d SPU . . 
 
loop_ 
 _atom_site_aniso_label 
 _atom_site_aniso_U_11 
 _atom_site_aniso_U_22 
 _atom_site_aniso_U_33 
 _atom_site_aniso_U_23 
 _atom_site_aniso_U_13 
 _atom_site_aniso_U_12 
Rb1 0.0363(6) 0.0363(6) 0.0324(9) 0.000 0.000 0.0181(3) 
Ca1 0.0147(5) 0.0155(7) 0.0151(7) 0.0006(7) 0.0003(3) 0.0078(4) 
Ca3 0.0118(8) 0.0118(8) 0.0097(14) 0.000 0.000 0.0059(4) 
Na1 0.0207(12) 0.0151(15) 0.0239(16) 0.0010(13) 0.0005(7) 0.0076(8) 
Na2 0.0155(8) 0.0155(8) 0.0193(12) -0.0017(4) 0.0017(4) 0.0082(9) 
Ca2 0.0155(8) 0.0155(8) 0.0193(12) -0.0017(4) 0.0017(4) 0.0082(9) 
C1 0.014(3) 0.014(3) 0.023(4) 0.0010(14) -0.0010(14) 0.010(3) 
C2 0.011(4) 0.011(4) 0.011(6) 0.000 0.000 0.0057(18) 
C3 0.015(3) 0.015(3) 0.016(4) -0.0004(13) 0.0004(13) 0.010(3) 
C4 0.015(4) 0.015(4) 0.008(6) 0.000 0.000 0.007(2) 
O1 0.024(2) 0.024(2) 0.015(3) 0.0023(13) -0.0023(13) 0.005(3) 
O2 0.017(2) 0.017(2) 0.045(4) -0.0026(13) 0.0026(13) 0.012(2) 
O3 0.0126(19) 0.0126(19) 0.048(4) -0.0005(12) 0.0005(12) 0.010(2) 
O4 0.0128(18) 0.0069(16) 0.035(2) 0.0004(17) 0.0013(16) 0.0023(15) 
O5 0.026(2) 0.048(3) 0.020(2) 0.001(2) -0.008(2) 0.004(2) 
O6 0.042(4) 0.042(4) 0.009(4) 0.000 0.000 0.0208(19) 
O7 0.189(10) 0.092(9) 0.064(8) 0.003(7) 0.001(4) 0.046(4) 
 
_geom_special_details 
; 
 All esds (except the esd in the dihedral angle between two l.s. planes) 
 are estimated using the full covariance matrix.  The cell esds are taken 
 into account individually in the estimation of esds in distances, angles 
 and torsion angles; correlations between esds in cell parameters are only 
 used when they are defined by crystal symmetry.  An approximate (isotropic) 
 treatment of cell esds is used for estimating esds involving l.s. planes. 
; 
 
loop_ 
 _geom_bond_atom_site_label_1 
 _geom_bond_atom_site_label_2 
 _geom_bond_distance 
 _geom_bond_site_symmetry_2 
 _geom_bond_publ_flag 
Rb1 O3 2.896(7) . ? 
Rb1 O3 2.896(7) 3_565 ? 
Rb1 O3 2.896(7) 2_665 ? 
Rb1 C3 3.253(8) 3_565 ? 
Rb1 C3 3.253(8) 2_665 ? 
Rb1 C3 3.253(8) . ? 
Rb1 C2 3.330(14) . ? 
Rb1 O5 3.435(6) 3_565 ? 
Rb1 O5 3.435(6) 9_565 ? 
Rb1 O5 3.435(6) 8 ? 
Rb1 O5 3.435(6) 2_665 ? 
Rb1 O5 3.435(6) . ? 
Ca1 O1 2.363(6) 5_564 ? 
Ca1 O3 2.497(2) 4_674 ? 
Ca1 O3 2.497(2) 6_664 ? 
Ca1 O5 2.506(5) 2_665 ? 
Ca1 O5 2.506(5) 9_565 ? 
Ca1 O4 2.588(4) 1_655 ? 
Ca1 O4 2.588(4) 8_455 ? 
Ca1 O2 2.6146(17) 3_565 ? 
Ca1 O2 2.6146(18) . ? 
Ca1 C3 2.867(8) 2_665 ? 
Ca1 C1 2.916(5) 1_655 ? 
Ca1 C1 2.916(5) 3_465 ? 
Ca3 O6 2.256(11) . ? 
Ca3 O7 2.41(2) 6_664 ? 
Ca3 O7 2.41(2) 4_574 ? 
Ca3 O7 2.41(2) 5_454 ? 
Ca3 O4 2.529(4) 3_465 ? 
Ca3 O4 2.529(4) 7_665 ? 
Ca3 O4 2.529(4) 9_575 ? 
Ca3 O4 2.529(4) . ? 
Ca3 O4 2.529(4) 8_455 ? 
Ca3 O4 2.529(4) 2_675 ? 
Ca3 C4 2.794(13) 4_574 ? 
Ca3 C1 2.911(8) 3_465 ? 
Na1 O5 2.366(5) . ? 
Na1 O5 2.366(5) 8 ? 
Na1 O2 2.368(7) 2_665 ? 
Na1 O7 2.45(2) 1_545 ? 
Na1 O4 2.468(5) 3_455 ? 
Na1 O4 2.468(5) 7_655 ? 
Na1 O6 2.546(3) 1_545 ? 
Na1 C4 2.856(7) 1_545 ? 
Na1 Ca3 3.385(4) 1_545 ? 
Na1 Ca1 3.454(3) 3_565 ? 
Na1 Ca1 3.454(3) 2_665 ? 
Na1 Na2 3.699(4) 2_665 ? 
Na2 O1 2.433(3) 5_564 ? 
Na2 O1 2.433(3) 6_554 ? 
Na2 O4 2.446(5) 8_455 ? 
Na2 O4 2.446(5) 2_675 ? 
Na2 O5 2.645(5) 11_564 ? 
Na2 O5 2.645(5) 5_564 ? 
Na2 O2 2.699(7) . ? 
Na2 C3 2.893(5) 6_554 ? 
Na2 C3 2.893(5) 5_564 ? 
Na2 O7 2.958(8) 4_574 ? 
Na2 O7 2.958(8) 5_454 ? 
C1 O3 1.272(10) 4_574 ? 
C1 O4 1.280(5) . ? 
C1 O4 1.280(5) 7_665 ? 
C1 Ca1 2.916(5) 1_455 ? 
C1 Ca1 2.916(5) 2_675 ? 
C1 Rb1 3.744(8) 4_574 ? 
C2 O2 1.282(5) . ? 
C2 O2 1.282(5) 3_565 ? 
C2 O2 1.282(5) 2_665 ? 
C2 Ca1 3.0061(19) 2_665 ? 
C2 Ca1 3.0061(19) 3_565 ? 
C3 O5 1.275(6) . ? 
C3 O5 1.275(6) 7_665 ? 
C3 O1 1.295(10) . ? 
C3 Ca1 2.867(8) 3_565 ? 
C3 Ca2 2.893(5) 5 ? 
C3 Na2 2.893(5) 5 ? 
C3 Ca2 2.893(5) 6_655 ? 
C3 Na2 2.893(5) 6_655 ? 
C4 O7 1.15(2) . ? 
C4 O7 1.15(2) 2_675 ? 
C4 O7 1.15(2) 3_465 ? 
C4 O6 1.269(18) . ? 
C4 Ca3 2.794(13) 4_575 ? 
C4 Na1 2.856(7) 2_565 ? 
C4 Na1 2.856(7) 1_565 ? 
C4 Na1 2.856(7) 3_565 ? 
O1 Ca1 2.363(6) 6_655 ? 
O1 Ca2 2.433(3) 6_655 ? 
O1 Na2 2.433(3) 5 ? 
O1 Na2 2.433(3) 6_655 ? 
O1 Ca2 2.433(3) 5 ? 
O2 Na1 2.368(7) 3_565 ? 
O2 Ca1 2.6146(18) 2_665 ? 
O3 C1 1.272(10) 4_575 ? 
O3 Ca1 2.497(2) 4_675 ? 
O3 Ca1 2.497(2) 5_455 ? 
O4 Ca2 2.446(5) 3_465 ? 
O4 Na2 2.446(5) 3_465 ? 
O4 Na1 2.468(5) 2_565 ? 
O4 Ca1 2.588(4) 1_455 ? 
O5 Ca1 2.506(5) 3_565 ? 
O5 Ca2 2.645(5) 6_655 ? 
O5 Na2 2.645(5) 6_655 ? 
O6 Na1 2.546(3) 2_565 ? 
O6 Na1 2.546(3) 1_565 ? 
O6 Na1 2.546(3) 3_565 ? 
O7 O7 1.71(3) 2_675 ? 
O7 O7 1.71(3) 3_465 ? 
O7 Ca3 2.41(2) 4_575 ? 
O7 Na1 2.45(2) 1_565 ? 
O7 Na2 2.958(8) 4_575 ? 
O7 Ca2 2.958(8) 4_575 ? 
O7 Na2 2.958(8) 6_665 ? 
O7 Ca2 2.958(8) 6_665 ? 
 
loop_ 
 _geom_angle_atom_site_label_1 
 _geom_angle_atom_site_label_2 
 _geom_angle_atom_site_label_3 
 _geom_angle 
 _geom_angle_site_symmetry_1 
 _geom_angle_site_symmetry_3 
 _geom_angle_publ_flag 
O3 Rb1 O3 59.00(19) . 3_565 ? 
O3 Rb1 O3 59.00(19) . 2_665 ? 
O3 Rb1 O3 59.0(2) 3_565 2_665 ? 
O3 Rb1 C3 82.41(13) . 3_565 ? 
O3 Rb1 C3 134.98(19) 3_565 3_565 ? 
O3 Rb1 C3 82.41(13) 2_665 3_565 ? 
O3 Rb1 C3 82.41(13) . 2_665 ? 
O3 Rb1 C3 82.41(13) 3_565 2_665 ? 
O3 Rb1 C3 134.98(19) 2_665 2_665 ? 
C3 Rb1 C3 116.86(8) 3_565 2_665 ? 
O3 Rb1 C3 134.98(19) . . ? 
O3 Rb1 C3 82.41(13) 3_565 . ? 
O3 Rb1 C3 82.41(13) 2_665 . ? 
C3 Rb1 C3 116.86(8) 3_565 . ? 
C3 Rb1 C3 116.86(8) 2_665 . ? 
O3 Rb1 C2 145.35(12) . . ? 
O3 Rb1 C2 145.35(12) 3_565 . ? 
O3 Rb1 C2 145.35(12) 2_665 . ? 
C3 Rb1 C2 79.67(14) 3_565 . ? 
C3 Rb1 C2 79.67(14) 2_665 . ? 
C3 Rb1 C2 79.67(14) . . ? 
O3 Rb1 O5 82.95(13) . 3_565 ? 
O3 Rb1 O5 141.89(13) 3_565 3_565 ? 
O3 Rb1 O5 101.19(9) 2_665 3_565 ? 
C3 Rb1 O5 21.75(10) 3_565 3_565 ? 
C3 Rb1 O5 95.56(9) 2_665 3_565 ? 
C3 Rb1 O5 130.15(12) . 3_565 ? 
C2 Rb1 O5 69.65(9) . 3_565 ? 
O3 Rb1 O5 82.95(13) . 9_565 ? 
O3 Rb1 O5 101.19(9) 3_565 9_565 ? 
O3 Rb1 O5 141.89(13) 2_665 9_565 ? 
C3 Rb1 O5 95.56(9) 3_565 9_565 ? 
C3 Rb1 O5 21.75(10) 2_665 9_565 ? 
C3 Rb1 O5 130.15(12) . 9_565 ? 
C2 Rb1 O5 69.65(8) . 9_565 ? 
O5 Rb1 O5 74.01(15) 3_565 9_565 ? 
O3 Rb1 O5 101.19(9) . 8 ? 
O3 Rb1 O5 141.89(14) 3_565 8 ? 
O3 Rb1 O5 82.95(13) 2_665 8 ? 
C3 Rb1 O5 21.75(10) 3_565 8 ? 
C3 Rb1 O5 130.15(12) 2_665 8 ? 
C3 Rb1 O5 95.56(9) . 8 ? 
C2 Rb1 O5 69.65(9) . 8 ? 
O5 Rb1 O5 37.52(15) 3_565 8 ? 
O5 Rb1 O5 108.58(9) 9_565 8 ? 
O3 Rb1 O5 101.19(9) . 2_665 ? 
O3 Rb1 O5 82.95(13) 3_565 2_665 ? 
O3 Rb1 O5 141.89(14) 2_665 2_665 ? 
C3 Rb1 O5 130.15(12) 3_565 2_665 ? 
C3 Rb1 O5 21.75(10) 2_665 2_665 ? 
C3 Rb1 O5 95.56(9) . 2_665 ? 
C2 Rb1 O5 69.65(9) . 2_665 ? 
O5 Rb1 O5 108.58(9) 3_565 2_665 ? 
O5 Rb1 O5 37.52(15) 9_565 2_665 ? 
O5 Rb1 O5 134.89(17) 8 2_665 ? 
O3 Rb1 O5 141.89(13) . . ? 
O3 Rb1 O5 101.19(9) 3_565 . ? 
O3 Rb1 O5 82.95(13) 2_665 . ? 
C3 Rb1 O5 95.56(9) 3_565 . ? 
C3 Rb1 O5 130.15(13) 2_665 . ? 
C3 Rb1 O5 21.75(10) . . ? 
C2 Rb1 O5 69.65(8) . . ? 
O5 Rb1 O5 108.58(9) 3_565 . ? 
O5 Rb1 O5 134.89(17) 9_565 . ? 
O5 Rb1 O5 74.01(15) 8 . ? 
O5 Rb1 O5 108.58(9) 2_665 . ? 
O1 Ca1 O3 94.6(2) 5_564 4_674 ? 
O1 Ca1 O3 94.6(2) 5_564 6_664 ? 
O3 Ca1 O3 69.7(3) 4_674 6_664 ? 
O1 Ca1 O5 148.10(14) 5_564 2_665 ? 
O3 Ca1 O5 85.3(2) 4_674 2_665 ? 
O3 Ca1 O5 115.0(2) 6_664 2_665 ? 
O1 Ca1 O5 148.10(14) 5_564 9_565 ? 
O3 Ca1 O5 115.0(2) 4_674 9_565 ? 
O3 Ca1 O5 85.3(2) 6_664 9_565 ? 
O5 Ca1 O5 52.3(2) 2_665 9_565 ? 
O1 Ca1 O4 78.93(11) 5_564 1_655 ? 
O3 Ca1 O4 51.49(13) 4_674 1_655 ? 
O3 Ca1 O4 119.51(17) 6_664 1_655 ? 
O5 Ca1 O4 76.19(15) 2_665 1_655 ? 
O5 Ca1 O4 128.47(15) 9_565 1_655 ? 
O1 Ca1 O4 78.93(11) 5_564 8_455 ? 
O3 Ca1 O4 119.51(17) 4_674 8_455 ? 
O3 Ca1 O4 51.49(13) 6_664 8_455 ? 
O5 Ca1 O4 128.47(15) 2_665 8_455 ? 
O5 Ca1 O4 76.19(15) 9_565 8_455 ? 
O4 Ca1 O4 155.1(2) 1_655 8_455 ? 
O1 Ca1 O2 75.5(2) 5_564 3_565 ? 
O3 Ca1 O2 119.23(17) 4_674 3_565 ? 
O3 Ca1 O2 166.72(19) 6_664 3_565 ? 
O5 Ca1 O2 76.82(19) 2_665 3_565 ? 
O5 Ca1 O2 98.4(2) 9_565 3_565 ? 
O4 Ca1 O2 67.85(14) 1_655 3_565 ? 
O4 Ca1 O2 116.87(16) 8_455 3_565 ? 
O1 Ca1 O2 75.5(2) 5_564 . ? 
O3 Ca1 O2 166.72(19) 4_674 . ? 
O3 Ca1 O2 119.23(17) 6_664 . ? 
O5 Ca1 O2 98.4(2) 2_665 . ? 
O5 Ca1 O2 76.8(2) 9_565 . ? 
O4 Ca1 O2 116.87(16) 1_655 . ? 
O4 Ca1 O2 67.85(14) 8_455 . ? 
O2 Ca1 O2 50.2(2) 3_565 . ? 
O1 Ca1 C3 164.4(2) 5_564 2_665 ? 
O3 Ca1 C3 98.2(2) 4_674 2_665 ? 
O3 Ca1 C3 98.2(2) 6_664 2_665 ? 
O5 Ca1 C3 26.36(10) 2_665 2_665 ? 
O5 Ca1 C3 26.36(10) 9_565 2_665 ? 
O4 Ca1 C3 102.20(11) 1_655 2_665 ? 
O4 Ca1 C3 102.20(11) 8_455 2_665 ? 
O2 Ca1 C3 90.5(2) 3_565 2_665 ? 
O2 Ca1 C3 90.5(2) . 2_665 ? 
O1 Ca1 C1 89.05(19) 5_564 1_655 ? 
O3 Ca1 C1 25.73(18) 4_674 1_655 ? 
O3 Ca1 C1 95.1(2) 6_664 1_655 ? 
O5 Ca1 C1 77.1(2) 2_665 1_655 ? 
O5 Ca1 C1 122.8(2) 9_565 1_655 ? 
O4 Ca1 C1 26.02(16) 1_655 1_655 ? 
O4 Ca1 C1 142.58(19) 8_455 1_655 ? 
O2 Ca1 C1 93.52(18) 3_565 1_655 ? 
O2 Ca1 C1 142.9(2) . 1_655 ? 
C3 Ca1 C1 98.61(19) 2_665 1_655 ? 
O1 Ca1 C1 89.05(19) 5_564 3_465 ? 
O3 Ca1 C1 95.1(2) 4_674 3_465 ? 
O3 Ca1 C1 25.73(19) 6_664 3_465 ? 
O5 Ca1 C1 122.8(2) 2_665 3_465 ? 
O5 Ca1 C1 77.1(2) 9_565 3_465 ? 
O4 Ca1 C1 142.58(19) 1_655 3_465 ? 
O4 Ca1 C1 26.02(16) 8_455 3_465 ? 
O2 Ca1 C1 142.9(2) 3_565 3_465 ? 
O2 Ca1 C1 93.52(18) . 3_465 ? 
C3 Ca1 C1 98.61(19) 2_665 3_465 ? 
C1 Ca1 C1 120.2(3) 1_655 3_465 ? 
O6 Ca3 O7 155.8(5) . 6_664 ? 
O6 Ca3 O7 155.8(5) . 4_574 ? 
O7 Ca3 O7 41.6(8) 6_664 4_574 ? 
O6 Ca3 O7 155.8(5) . 5_454 ? 
O7 Ca3 O7 41.6(8) 6_664 5_454 ? 
O7 Ca3 O7 41.6(8) 4_574 5_454 ? 
O6 Ca3 O4 84.31(13) . 3_465 ? 
O7 Ca3 O4 96.78(12) 6_664 3_465 ? 
O7 Ca3 O4 115.4(4) 4_574 3_465 ? 
O7 Ca3 O4 74.0(5) 5_454 3_465 ? 
O6 Ca3 O4 84.31(13) . 7_665 ? 
O7 Ca3 O4 74.0(5) 6_664 7_665 ? 
O7 Ca3 O4 115.4(4) 4_574 7_665 ? 
O7 Ca3 O4 96.78(12) 5_454 7_665 ? 
O4 Ca3 O4 67.35(16) 3_465 7_665 ? 
O6 Ca3 O4 84.31(13) . 9_575 ? 
O7 Ca3 O4 96.78(12) 6_664 9_575 ? 
O7 Ca3 O4 74.0(5) 4_574 9_575 ? 
O7 Ca3 O4 115.4(4) 5_454 9_575 ? 
O4 Ca3 O4 166.2(2) 3_465 9_575 ? 
O4 Ca3 O4 119.03(4) 7_665 9_575 ? 
O6 Ca3 O4 84.31(13) . . ? 
O7 Ca3 O4 74.0(5) 6_664 . ? 
O7 Ca3 O4 96.78(12) 4_574 . ? 
O7 Ca3 O4 115.4(4) 5_454 . ? 
O4 Ca3 O4 119.03(4) 3_465 . ? 
O4 Ca3 O4 52.00(16) 7_665 . ? 
O4 Ca3 O4 67.35(16) 9_575 . ? 
O6 Ca3 O4 84.31(13) . 8_455 ? 
O7 Ca3 O4 115.4(4) 6_664 8_455 ? 
O7 Ca3 O4 96.78(12) 4_574 8_455 ? 
O7 Ca3 O4 74.0(5) 5_454 8_455 ? 
O4 Ca3 O4 51.99(16) 3_465 8_455 ? 
O4 Ca3 O4 119.03(4) 7_665 8_455 ? 
O4 Ca3 O4 119.03(4) 9_575 8_455 ? 
O4 Ca3 O4 166.2(2) . 8_455 ? 
O6 Ca3 O4 84.31(13) . 2_675 ? 
O7 Ca3 O4 115.4(4) 6_664 2_675 ? 
O7 Ca3 O4 74.0(5) 4_574 2_675 ? 
O7 Ca3 O4 96.78(12) 5_454 2_675 ? 
O4 Ca3 O4 119.03(4) 3_465 2_675 ? 
O4 Ca3 O4 166.2(2) 7_665 2_675 ? 
O4 Ca3 O4 52.00(16) 9_575 2_675 ? 
O4 Ca3 O4 119.03(4) . 2_675 ? 
O4 Ca3 O4 67.35(16) 8_455 2_675 ? 
O6 Ca3 C4 180.000(2) . 4_574 ? 
O7 Ca3 C4 24.2(5) 6_664 4_574 ? 
O7 Ca3 C4 24.2(5) 4_574 4_574 ? 
O7 Ca3 C4 24.2(5) 5_454 4_574 ? 
O4 Ca3 C4 95.69(13) 3_465 4_574 ? 
O4 Ca3 C4 95.69(13) 7_665 4_574 ? 
O4 Ca3 C4 95.69(13) 9_575 4_574 ? 
O4 Ca3 C4 95.69(13) . 4_574 ? 
O4 Ca3 C4 95.69(13) 8_455 4_574 ? 
O4 Ca3 C4 95.69(13) 2_675 4_574 ? 
O6 Ca3 C1 84.61(18) . 3_465 ? 
O7 Ca3 C1 106.8(3) 6_664 3_465 ? 
O7 Ca3 C1 106.8(3) 4_574 3_465 ? 
O7 Ca3 C1 71.2(5) 5_454 3_465 ? 
O4 Ca3 C1 26.01(8) 3_465 3_465 ? 
O4 Ca3 C1 93.29(9) 7_665 3_465 ? 
O4 Ca3 C1 144.42(11) 9_575 3_465 ? 
O4 Ca3 C1 144.42(11) . 3_465 ? 
O4 Ca3 C1 26.01(8) 8_455 3_465 ? 
O4 Ca3 C1 93.29(8) 2_675 3_465 ? 
C4 Ca3 C1 95.39(18) 4_574 3_465 ? 
O5 Na1 O5 121.9(3) . 8 ? 
O5 Na1 O2 84.49(17) . 2_665 ? 
O5 Na1 O2 84.49(17) 8 2_665 ? 
O5 Na1 O7 87.0(3) . 1_545 ? 
O5 Na1 O7 87.0(3) 8 1_545 ? 
O2 Na1 O7 162.3(6) 2_665 1_545 ? 
O5 Na1 O4 81.09(17) . 3_455 ? 
O5 Na1 O4 147.0(2) 8 3_455 ? 
O2 Na1 O4 73.75(18) 2_665 3_455 ? 
O7 Na1 O4 120.1(4) 1_545 3_455 ? 
O5 Na1 O4 147.0(2) . 7_655 ? 
O5 Na1 O4 81.09(17) 8 7_655 ? 
O2 Na1 O4 73.75(18) 2_665 7_655 ? 
O7 Na1 O4 120.1(4) 1_545 7_655 ? 
O4 Na1 O4 69.2(2) 3_455 7_655 ? 
O5 Na1 O6 109.60(18) . 1_545 ? 
O5 Na1 O6 109.60(18) 8 1_545 ? 
O2 Na1 O6 147.7(4) 2_665 1_545 ? 
O7 Na1 O6 49.9(6) 1_545 1_545 ? 
O4 Na1 O6 79.8(3) 3_455 1_545 ? 
O4 Na1 O6 79.8(3) 7_655 1_545 ? 
O5 Na1 C4 98.30(19) . 1_545 ? 
O5 Na1 C4 98.30(19) 8 1_545 ? 
O2 Na1 C4 174.1(3) 2_665 1_545 ? 
O7 Na1 C4 23.6(6) 1_545 1_545 ? 
O4 Na1 C4 101.5(2) 3_455 1_545 ? 
O4 Na1 C4 101.5(2) 7_655 1_545 ? 
O6 Na1 C4 26.4(4) 1_545 1_545 ? 
O5 Na1 Ca3 118.96(15) . 1_545 ? 
O5 Na1 Ca3 118.96(15) 8 1_545 ? 
O2 Na1 Ca3 105.9(2) 2_665 1_545 ? 
O7 Na1 Ca3 91.7(5) 1_545 1_545 ? 
O4 Na1 Ca3 48.13(11) 3_455 1_545 ? 
O4 Na1 Ca3 48.13(11) 7_655 1_545 ? 
O6 Na1 Ca3 41.8(3) 1_545 1_545 ? 
C4 Na1 Ca3 68.2(2) 1_545 1_545 ? 
O5 Na1 Ca1 46.51(13) . 3_565 ? 
O5 Na1 Ca1 128.93(17) 8 3_565 ? 
O2 Na1 Ca1 49.14(5) 2_665 3_565 ? 
O7 Na1 Ca1 130.12(11) 1_545 3_565 ? 
O4 Na1 Ca1 48.37(10) 3_455 3_565 ? 
O4 Na1 Ca1 101.03(15) 7_655 3_565 ? 
O6 Na1 Ca1 121.09(15) 1_545 3_565 ? 
C4 Na1 Ca1 130.07(6) 1_545 3_565 ? 
Ca3 Na1 Ca1 96.50(8) 1_545 3_565 ? 
O5 Na1 Ca1 128.93(17) . 2_665 ? 
O5 Na1 Ca1 46.51(13) 8 2_665 ? 
O2 Na1 Ca1 49.14(5) 2_665 2_665 ? 
O7 Na1 Ca1 130.12(11) 1_545 2_665 ? 
O4 Na1 Ca1 101.03(15) 3_455 2_665 ? 
O4 Na1 Ca1 48.37(10) 7_655 2_665 ? 
O6 Na1 Ca1 121.09(15) 1_545 2_665 ? 
C4 Na1 Ca1 130.07(6) 1_545 2_665 ? 
Ca3 Na1 Ca1 96.50(8) 1_545 2_665 ? 
Ca1 Na1 Ca1 97.72(10) 3_565 2_665 ? 
O5 Na1 Na2 106.32(15) . 2_665 ? 
O5 Na1 Na2 106.32(15) 8 2_665 ? 
O2 Na1 Na2 46.75(17) 2_665 2_665 ? 
O7 Na1 Na2 150.9(5) 1_545 2_665 ? 
O4 Na1 Na2 40.94(11) 3_455 2_665 ? 
O4 Na1 Na2 40.94(11) 7_655 2_665 ? 
O6 Na1 Na2 101.0(3) 1_545 2_665 ? 
C4 Na1 Na2 127.4(3) 1_545 2_665 ? 
Ca3 Na1 Na2 59.18(8) 1_545 2_665 ? 
Ca1 Na1 Na2 60.10(6) 3_565 2_665 ? 
Ca1 Na1 Na2 60.10(6) 2_665 2_665 ? 
O1 Na2 O1 104.1(3) 5_564 6_554 ? 
O1 Na2 O4 80.48(17) 5_564 8_455 ? 
O1 Na2 O4 137.64(19) 6_554 8_455 ? 
O1 Na2 O4 137.64(19) 5_564 2_675 ? 
O1 Na2 O4 80.48(17) 6_554 2_675 ? 
O4 Na2 O4 70.0(2) 8_455 2_675 ? 
O1 Na2 O5 119.6(2) 5_564 11_564 ? 
O1 Na2 O5 51.76(17) 6_554 11_564 ? 
O4 Na2 O5 157.60(18) 8_455 11_564 ? 
O4 Na2 O5 96.64(16) 2_675 11_564 ? 
O1 Na2 O5 51.76(17) 5_564 5_564 ? 
O1 Na2 O5 119.6(2) 6_554 5_564 ? 
O4 Na2 O5 96.64(16) 8_455 5_564 ? 
O4 Na2 O5 157.60(18) 2_675 5_564 ? 
O5 Na2 O5 89.7(2) 11_564 5_564 ? 
O1 Na2 O2 72.80(16) 5_564 . ? 
O1 Na2 O2 72.80(16) 6_554 . ? 
O4 Na2 O2 68.51(15) 8_455 . ? 
O4 Na2 O2 68.51(15) 2_675 . ? 
O5 Na2 O2 124.47(14) 11_564 . ? 
O5 Na2 O2 124.47(14) 5_564 . ? 
O1 Na2 C3 109.9(2) 5_564 6_554 ? 
O1 Na2 C3 26.39(19) 6_554 6_554 ? 
O4 Na2 C3 161.3(2) 8_455 6_554 ? 
O4 Na2 C3 92.80(18) 2_675 6_554 ? 
O5 Na2 C3 26.13(15) 11_564 6_554 ? 
O5 Na2 C3 102.0(2) 5_564 6_554 ? 
O2 Na2 C3 99.00(16) . 6_554 ? 
O1 Na2 C3 26.39(19) 5_564 5_564 ? 
O1 Na2 C3 109.9(2) 6_554 5_564 ? 
O4 Na2 C3 92.80(18) 8_455 5_564 ? 
O4 Na2 C3 161.3(2) 2_675 5_564 ? 
O5 Na2 C3 102.0(2) 11_564 5_564 ? 
O5 Na2 C3 26.13(15) 5_564 5_564 ? 
O2 Na2 C3 99.00(16) . 5_564 ? 
C3 Na2 C3 103.1(3) 6_554 5_564 ? 
O1 Na2 O7 142.3(4) 5_564 4_574 ? 
O1 Na2 O7 109.6(4) 6_554 4_574 ? 
O4 Na2 O7 85.7(4) 8_455 4_574 ? 
O4 Na2 O7 66.0(5) 2_675 4_574 ? 
O5 Na2 O7 72.3(4) 11_564 4_574 ? 
O5 Na2 O7 95.9(4) 5_564 4_574 ? 
O2 Na2 O7 133.1(5) . 4_574 ? 
C3 Na2 O7 94.0(4) 6_554 4_574 ? 
C3 Na2 O7 121.5(4) 5_564 4_574 ? 
O1 Na2 O7 109.6(4) 5_564 5_454 ? 
O1 Na2 O7 142.3(4) 6_554 5_454 ? 
O4 Na2 O7 66.0(5) 8_455 5_454 ? 
O4 Na2 O7 85.7(4) 2_675 5_454 ? 
O5 Na2 O7 95.9(4) 11_564 5_454 ? 
O5 Na2 O7 72.3(4) 5_564 5_454 ? 
O2 Na2 O7 133.1(5) . 5_454 ? 
C3 Na2 O7 121.5(4) 6_554 5_454 ? 
C3 Na2 O7 94.0(4) 5_564 5_454 ? 
O7 Na2 O7 33.6(7) 4_574 5_454 ? 
O1 Na2 Ca3 124.45(15) 5_564 . ? 
O1 Na2 Ca3 124.45(15) 6_554 . ? 
O4 Na2 Ca3 46.13(11) 8_455 . ? 
O4 Na2 Ca3 46.13(11) 2_675 . ? 
O5 Na2 Ca3 111.65(12) 11_564 . ? 
O5 Na2 Ca3 111.65(12) 5_564 . ? 
O2 Na2 Ca3 95.66(15) . . ? 
C3 Na2 Ca3 125.67(15) 6_554 . ? 
C3 Na2 Ca3 125.67(15) 5_564 . ? 
O7 Na2 Ca3 42.7(4) 4_574 . ? 
O7 Na2 Ca3 42.7(4) 5_454 . ? 
O3 C1 O4 120.0(4) 4_574 . ? 
O3 C1 O4 120.0(4) 4_574 7_665 ? 
O4 C1 O4 120.0(8) . 7_665 ? 
O3 C1 Ca3 176.3(6) 4_574 . ? 
O4 C1 Ca3 60.1(4) . . ? 
O4 C1 Ca3 60.1(4) 7_665 . ? 
O3 C1 Ca1 58.42(17) 4_574 1_455 ? 
O4 C1 Ca1 62.5(3) . 1_455 ? 
O4 C1 Ca1 170.4(6) 7_665 1_455 ? 
Ca3 C1 Ca1 122.23(15) . 1_455 ? 
O3 C1 Ca1 58.42(17) 4_574 2_675 ? 
O4 C1 Ca1 170.4(6) . 2_675 ? 
O4 C1 Ca1 62.5(3) 7_665 2_675 ? 
Ca3 C1 Ca1 122.23(15) . 2_675 ? 
Ca1 C1 Ca1 113.3(3) 1_455 2_675 ? 
O3 C1 Rb1 40.5(4) 4_574 4_574 ? 
O4 C1 Rb1 112.2(4) . 4_574 ? 
O4 C1 Rb1 112.2(4) 7_665 4_574 ? 
Ca3 C1 Rb1 135.8(3) . 4_574 ? 
Ca1 C1 Rb1 73.12(17) 1_455 4_574 ? 
Ca1 C1 Rb1 73.12(17) 2_675 4_574 ? 
O2 C2 O2 119.95(6) . 3_565 ? 
O2 C2 O2 119.95(6) . 2_665 ? 
O2 C2 O2 119.95(6) 3_565 2_665 ? 
O2 C2 Ca1 60.09(3) . 2_665 ? 
O2 C2 Ca1 179.1(10) 3_565 2_665 ? 
O2 C2 Ca1 60.08(3) 2_665 2_665 ? 
O2 C2 Ca1 60.08(3) . . ? 
O2 C2 Ca1 60.09(3) 3_565 . ? 
O2 C2 Ca1 179.1(10) 2_665 . ? 
Ca1 C2 Ca1 119.86(4) 2_665 . ? 
O2 C2 Ca1 179.1(10) . 3_565 ? 
O2 C2 Ca1 60.08(3) 3_565 3_565 ? 
O2 C2 Ca1 60.08(3) 2_665 3_565 ? 
Ca1 C2 Ca1 119.86(4) 2_665 3_565 ? 
Ca1 C2 Ca1 119.86(4) . 3_565 ? 
O2 C2 Rb1 88.8(7) . . ? 
O2 C2 Rb1 88.8(7) 3_565 . ? 
O2 C2 Rb1 88.8(7) 2_665 . ? 
Ca1 C2 Rb1 92.2(3) 2_665 . ? 
Ca1 C2 Rb1 92.2(3) . . ? 
Ca1 C2 Rb1 92.2(3) 3_565 . ? 
O5 C3 O5 120.2(7) . 7_665 ? 
O5 C3 O1 119.9(4) . . ? 
O5 C3 O1 119.9(4) 7_665 . ? 
O5 C3 Ca1 60.8(4) . 3_565 ? 
O5 C3 Ca1 60.8(4) 7_665 3_565 ? 
O1 C3 Ca1 165.9(6) . 3_565 ? 
O5 C3 Ca2 160.9(6) . 5 ? 
O5 C3 Ca2 66.0(3) 7_665 5 ? 
O1 C3 Ca2 56.59(19) . 5 ? 
Ca1 C3 Ca2 117.46(18) 3_565 5 ? 
O5 C3 Na2 160.9(6) . 5 ? 
O5 C3 Na2 66.0(3) 7_665 5 ? 
O1 C3 Na2 56.59(19) . 5 ? 
Ca1 C3 Na2 117.46(18) 3_565 5 ? 
Ca2 C3 Na2 0.00(11) 5 5 ? 
O5 C3 Ca2 66.0(3) . 6_655 ? 
O5 C3 Ca2 160.9(6) 7_665 6_655 ? 
O1 C3 Ca2 56.59(19) . 6_655 ? 
Ca1 C3 Ca2 117.46(18) 3_565 6_655 ? 
Ca2 C3 Ca2 102.4(3) 5 6_655 ? 
Na2 C3 Ca2 102.4(3) 5 6_655 ? 
O5 C3 Na2 66.0(3) . 6_655 ? 
O5 C3 Na2 160.9(6) 7_665 6_655 ? 
O1 C3 Na2 56.59(19) . 6_655 ? 
Ca1 C3 Na2 117.46(18) 3_565 6_655 ? 
Ca2 C3 Na2 102.4(3) 5 6_655 ? 
Na2 C3 Na2 102.4(3) 5 6_655 ? 
Ca2 C3 Na2 0.0 6_655 6_655 ? 
O5 C3 Rb1 87.2(4) . . ? 
O5 C3 Rb1 87.2(4) 7_665 . ? 
O1 C3 Rb1 97.7(5) . . ? 
Ca1 C3 Rb1 96.4(2) 3_565 . ? 
Ca2 C3 Rb1 111.71(18) 5 . ? 
Na2 C3 Rb1 111.71(18) 5 . ? 
Ca2 C3 Rb1 111.71(18) 6_655 . ? 
Na2 C3 Rb1 111.71(18) 6_655 . ? 
O7 C4 O7 95.7(17) . 2_675 ? 
O7 C4 O7 95.7(17) . 3_465 ? 
O7 C4 O7 95.7(17) 2_675 3_465 ? 
O7 C4 O6 121.1(13) . . ? 
O7 C4 O6 121.1(13) 2_675 . ? 
O7 C4 O6 121.1(13) 3_465 . ? 
O7 C4 Ca3 58.9(13) . 4_575 ? 
O7 C4 Ca3 58.9(13) 2_675 4_575 ? 
O7 C4 Ca3 58.9(13) 3_465 4_575 ? 
O6 C4 Ca3 180.000(3) . 4_575 ? 
O7 C4 Na1 128.0(2) . 2_565 ? 
O7 C4 Na1 58.1(12) 2_675 2_565 ? 
O7 C4 Na1 128.0(2) 3_465 2_565 ? 
O6 C4 Na1 63.0(2) . 2_565 ? 
Ca3 C4 Na1 117.0(2) 4_575 2_565 ? 
O7 C4 Na1 58.1(12) . 1_565 ? 
O7 C4 Na1 128.0(2) 2_675 1_565 ? 
O7 C4 Na1 128.0(2) 3_465 1_565 ? 
O6 C4 Na1 63.0(2) . 1_565 ? 
Ca3 C4 Na1 117.0(2) 4_575 1_565 ? 
Na1 C4 Na1 101.1(3) 2_565 1_565 ? 
O7 C4 Na1 128.0(2) . 3_565 ? 
O7 C4 Na1 128.0(2) 2_675 3_565 ? 
O7 C4 Na1 58.1(12) 3_465 3_565 ? 
O6 C4 Na1 63.0(2) . 3_565 ? 
Ca3 C4 Na1 117.0(2) 4_575 3_565 ? 
Na1 C4 Na1 101.1(3) 2_565 3_565 ? 
Na1 C4 Na1 101.1(3) 1_565 3_565 ? 
C3 O1 Ca1 142.5(5) . 6_655 ? 
C3 O1 Ca2 97.0(2) . 6_655 ? 
Ca1 O1 Ca2 96.86(16) 6_655 6_655 ? 
C3 O1 Na2 97.0(2) . 5 ? 
Ca1 O1 Na2 96.86(16) 6_655 5 ? 
Ca2 O1 Na2 135.9(3) 6_655 5 ? 
C3 O1 Na2 97.0(2) . 6_655 ? 
Ca1 O1 Na2 96.86(16) 6_655 6_655 ? 
Ca2 O1 Na2 0.00(16) 6_655 6_655 ? 
Na2 O1 Na2 135.9(3) 5 6_655 ? 
C3 O1 Ca2 97.0(2) . 5 ? 
Ca1 O1 Ca2 96.86(16) 6_655 5 ? 
Ca2 O1 Ca2 135.9(3) 6_655 5 ? 
Na2 O1 Ca2 0.00(11) 5 5 ? 
Na2 O1 Ca2 135.9(3) 6_655 5 ? 
C2 O2 Na1 148.4(8) . 3_565 ? 
C2 O2 Ca1 94.76(13) . 2_665 ? 
Na1 O2 Ca1 87.63(13) 3_565 2_665 ? 
C2 O2 Ca1 94.76(13) . . ? 
Na1 O2 Ca1 87.63(13) 3_565 . ? 
Ca1 O2 Ca1 168.5(3) 2_665 . ? 
C2 O2 Na2 118.1(8) . . ? 
Na1 O2 Na2 93.5(2) 3_565 . ? 
Ca1 O2 Na2 84.93(16) 2_665 . ? 
Ca1 O2 Na2 84.93(16) . . ? 
C2 O2 Rb1 70.0(7) . . ? 
Na1 O2 Rb1 78.4(2) 3_565 . ? 
Ca1 O2 Rb1 94.64(16) 2_665 . ? 
Ca1 O2 Rb1 94.64(16) . . ? 
Na2 O2 Rb1 171.9(2) . . ? 
C1 O3 Ca1 95.85(16) 4_575 4_675 ? 
C1 O3 Ca1 95.85(16) 4_575 5_455 ? 
Ca1 O3 Ca1 154.6(3) 4_675 5_455 ? 
C1 O3 Rb1 123.0(6) 4_575 . ? 
Ca1 O3 Rb1 96.18(15) 4_675 . ? 
Ca1 O3 Rb1 96.18(15) 5_455 . ? 
C1 O4 Ca2 137.6(5) . 3_465 ? 
C1 O4 Na2 137.6(5) . 3_465 ? 
Ca2 O4 Na2 0.00(13) 3_465 3_465 ? 
C1 O4 Na1 124.7(5) . 2_565 ? 
Ca2 O4 Na1 97.66(15) 3_465 2_565 ? 
Na2 O4 Na1 97.66(15) 3_465 2_565 ? 
C1 O4 Ca3 93.9(4) . . ? 
Ca2 O4 Ca3 89.68(15) 3_465 . ? 
Na2 O4 Ca3 89.68(15) 3_465 . ? 
Na1 O4 Ca3 85.25(16) 2_565 . ? 
C1 O4 Ca1 91.5(4) . 1_455 ? 
Ca2 O4 Ca1 90.89(15) 3_465 1_455 ? 
Na2 O4 Ca1 90.89(15) 3_465 1_455 ? 
Na1 O4 Ca1 86.15(15) 2_565 1_455 ? 
Ca3 O4 Ca1 171.4(2) . 1_455 ? 
C3 O5 Na1 151.7(5) . . ? 
C3 O5 Ca1 92.8(4) . 3_565 ? 
Na1 O5 Ca1 90.27(18) . 3_565 ? 
C3 O5 Ca2 87.9(4) . 6_655 ? 
Na1 O5 Ca2 104.9(2) . 6_655 ? 
Ca1 O5 Ca2 145.8(2) 3_565 6_655 ? 
C3 O5 Na2 87.9(4) . 6_655 ? 
Na1 O5 Na2 104.9(2) . 6_655 ? 
Ca1 O5 Na2 145.8(2) 3_565 6_655 ? 
Ca2 O5 Na2 0.00(4) 6_655 6_655 ? 
C3 O5 Rb1 71.1(4) . . ? 
Na1 O5 Rb1 80.71(17) . . ? 
Ca1 O5 Rb1 99.37(17) 3_565 . ? 
Ca2 O5 Rb1 113.06(17) 6_655 . ? 
Na2 O5 Rb1 113.06(17) 6_655 . ? 
C4 O6 Ca3 180.000(3) . . ? 
C4 O6 Na1 90.6(3) . 2_565 ? 
Ca3 O6 Na1 89.4(3) . 2_565 ? 
C4 O6 Na1 90.6(3) . 1_565 ? 
Ca3 O6 Na1 89.4(3) . 1_565 ? 
Na1 O6 Na1 119.990(10) 2_565 1_565 ? 
C4 O6 Na1 90.6(3) . 3_565 ? 
Ca3 O6 Na1 89.4(3) . 3_565 ? 
Na1 O6 Na1 119.990(10) 2_565 3_565 ? 
Na1 O6 Na1 119.990(11) 1_565 3_565 ? 
C4 O7 O7 42.1(9) . 2_675 ? 
C4 O7 O7 42.1(9) . 3_465 ? 
O7 O7 O7 60.000(4) 2_675 3_465 ? 
C4 O7 Ca3 96.9(14) . 4_575 ? 
O7 O7 Ca3 69.2(4) 2_675 4_575 ? 
O7 O7 Ca3 69.2(4) 3_465 4_575 ? 
C4 O7 Na1 98.4(15) . 1_565 ? 
O7 O7 Na1 123.4(4) 2_675 1_565 ? 
O7 O7 Na1 123.4(4) 3_465 1_565 ? 
Ca3 O7 Na1 164.7(10) 4_575 1_565 ? 
C4 O7 Na2 108.5(4) . 4_575 ? 
O7 O7 Na2 73.2(4) 2_675 4_575 ? 
O7 O7 Na2 130.7(4) 3_465 4_575 ? 
Ca3 O7 Na2 80.9(5) 4_575 4_575 ? 
Na1 O7 Na2 94.2(4) 1_565 4_575 ? 
C4 O7 Ca2 108.5(4) . 4_575 ? 
O7 O7 Ca2 73.2(4) 2_675 4_575 ? 
O7 O7 Ca2 130.7(4) 3_465 4_575 ? 
Ca3 O7 Ca2 80.9(5) 4_575 4_575 ? 
Na1 O7 Ca2 94.2(4) 1_565 4_575 ? 
Na2 O7 Ca2 0.000(18) 4_575 4_575 ? 
C4 O7 Na2 108.5(4) . 6_665 ? 
O7 O7 Na2 130.7(4) 2_675 6_665 ? 
O7 O7 Na2 73.2(4) 3_465 6_665 ? 
Ca3 O7 Na2 80.9(5) 4_575 6_665 ? 
Na1 O7 Na2 94.2(4) 1_565 6_665 ? 
Na2 O7 Na2 140.3(8) 4_575 6_665 ? 
Ca2 O7 Na2 140.3(8) 4_575 6_665 ? 
C4 O7 Ca2 108.5(4) . 6_665 ? 
O7 O7 Ca2 130.7(4) 2_675 6_665 ? 
O7 O7 Ca2 73.2(4) 3_465 6_665 ? 
Ca3 O7 Ca2 80.9(5) 4_575 6_665 ? 
Na1 O7 Ca2 94.2(4) 1_565 6_665 ? 
Na2 O7 Ca2 140.3(8) 4_575 6_665 ? 
Ca2 O7 Ca2 140.3(8) 4_575 6_665 ? 
Na2 O7 Ca2 0.00(9) 6_665 6_665 ? 
 
_diffrn_measured_fraction_theta_max    1.000 
_diffrn_reflns_theta_full              27.46 
_diffrn_measured_fraction_theta_full   1.000 
_refine_diff_density_max    1.608 
_refine_diff_density_min   -0.821 
_refine_diff_density_rms    0.128 
